# Supplementary material for: Rapid fabrication of bio-inspired nanostructure with hydrophobicity and antireflectivity on polystyrene surface replicating from cicada wings
Source: Royal Society of Chemistry journal article supplement (doi:10.1039/c7nr04176d), 2017-01-01
Supplement: c7nr04176d1.pdf [file c7nr04176d1.pdf]

## Supplementary material

### Rapid fabrication of bio-inspired nanostructures with hydrophobicity and antireflectivity on polystyrene surface replicating from cicada wings

Heng Xie, Han-Xiong Huang\* and Yu-Jiang Peng

Lab for Micro Molding and Polymer Rheology, The Key Laboratory of Polymer Processing Engineering of the Ministry of Education, South China University of Technology, Guangzhou, 510640, China.

Email: [mmhuang@scut.edu.cn](mailto:mmhuang@scut.edu.cn); Fax: +86 20 22236799

1. Water contact angle on the natural cicada wing where the nanopillars were worn off.

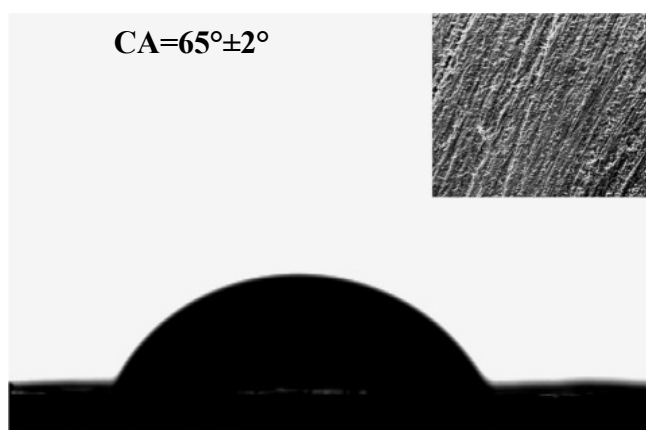

**Fig. S1** Water contact angle and (insert) SEM image of natural cicada wing where nanopillars were worn off.

2. Tensile strength test of the prepared nickel plate.

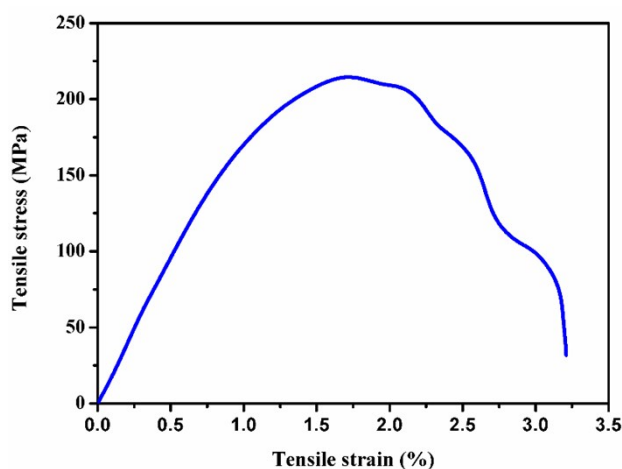

**Fig. S2** Stress-strain curve of prepared nickel template.
